# Supplementary material for: Diurnal Variation in P-glycoprotein-Mediated Transport and Cerebrospinal Fluid Turnover in the Brain
Source: PubMed Central journal article supplement (PMC4147055; doi:10.1208/s12248-014-9625-4), 2014-06-11
Supplement: 12248_2014_9625_MOESM1_ESM.pdf [file 12248_2014_9625_MOESM1_ESM.pdf]

**Supplemental Table I. Number of animals per treatment group**

| <b>Experiment</b>                      | <b>ZT0</b> | <b>ZT4</b> | <b>ZT8</b> | <b>ZT12</b> | <b>ZT16</b> | <b>ZT20</b> |
|----------------------------------------|------------|------------|------------|-------------|-------------|-------------|
| Brain distribution                     |            |            |            |             |             |             |
| Vehicle + 10mg/kg quinidine            | 7          | 8          | 5          | 8           | 8           | 5           |
| 15mg/kg tariquidar + 10mg/kg quinidine | 7          | 7          | 6          | 7           | 6           | 5           |
| Microdialysis                          |            |            |            |             |             |             |
| Vehicle + 10mg/kg quinidine            | ND         | ND         | 8          | ND          | ND          | 6           |
| 15mg/kg tariquidar + 10mg/kg quinidine | ND         | ND         | 8          | ND          | ND          | 7           |
| In vivo retrodialysis                  |            |            |            |             |             |             |
| Vehicle + 10mg/kg quinidine            | ND         | ND         | 1          | ND          | ND          | 2           |
| 15mg/kg tariquidar + 10mg.kg quinidine | ND         | ND         | 1          | ND          | ND          | 1           |
