# Supplementary material for: Diurnal Variation in P-glycoprotein-Mediated Transport and Cerebrospinal Fluid Turnover in the Brain
Source: PubMed Central journal article supplement (PMC4147055; doi:10.1208/s12248-014-9625-4), 2014-06-11
Supplement: 12248_2014_9625_MOESM3_ESM.pdf [file 12248_2014_9625_MOESM3_ESM.pdf]

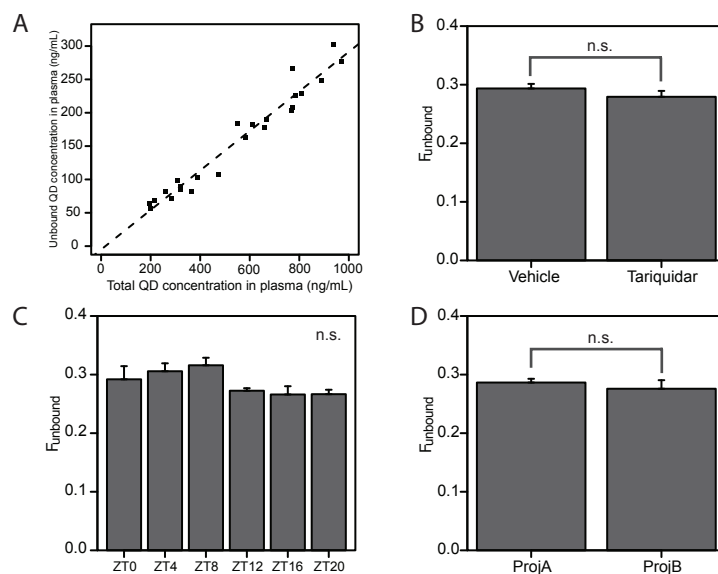

**Supplemental Figure 2. Plasma protein binding.** (A) Correlation between total and unbound quinidine concentrations in plasma from the brain distribution experiments. There is a strong linear correlation between total and unbound concentrations ( $r^2=0.953$ ,  $N=24$  samples,  $p=0.000$ ). (B and C) Effect of tariquidar treatment (B,  $n=12$  samples per group) and experimental time point (C,  $n=4$  samples per group) on the unbound fraction of quinidine in plasma. A two-way ANOVA showed no significant effect of TQD treatment (TQD vs. vehicle:  $F(1,17)=1.70$ ,  $p=0.21$ ) and of time of administration ( $F(5,17)=2.52$ ,  $p=0.07$ ). (D) Effect of experimental set-up on the unbound fraction of quinidine in plasma. There is no significant difference in the unbound fraction between brain distribution (projA,  $n=24$  samples) and microdialysis experiments (projB,  $n=7$  samples) ( $t(29)=0.747$ ,  $p=0.46$ , t-test). Mean $\pm$ SEM in all graphs. N.s.: not significant.
