# Supplementary material for: Diurnal Variation in P-glycoprotein-Mediated Transport and Cerebrospinal Fluid Turnover in the Brain
Source: PubMed Central journal article supplement (PMC4147055; doi:10.1208/s12248-014-9625-4), 2014-06-11
Supplement: 12248_2014_9625_MOESM4_ESM.pdf [file 12248_2014_9625_MOESM4_ESM.pdf]

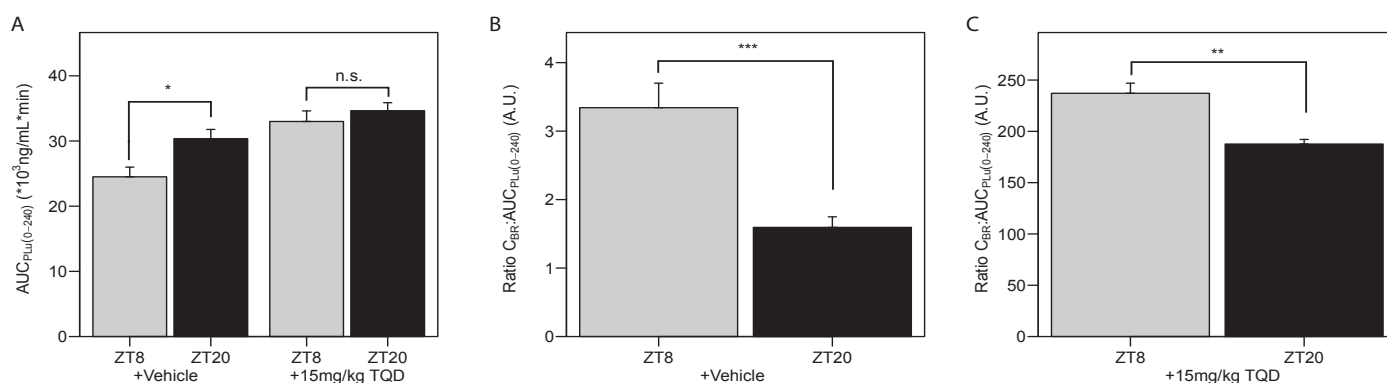

**Supplemental Figure 3. Quinidine exposure in plasma and brain in the microdialysis group.**

(A) Area under the curve for unbound quinidine in plasma from 0 to 240 minutes after administration ( $AUC_{PLU,0-240}$ ) at different experimental time points in vehicle and TQD treated animals (n=7-8 animals/group). Time of administration had a significant effect on  $AUC_{PLU,0-240}$  in vehicle treated animals ( $t(12)=-2.84$ ,  $p=0.014$ , t-test), but not in TQD treated animals ( $t(13)=-0.79$ ,  $p=0.44$ , t-test). (B-C) Quinidine concentration at t=240min in brain tissue relative to plasma AUC ( $C_{BR:AUC_{PLU,0-240}}$ ) at different experimental time points in vehicle (B) and TQD (C) treated animals (n=6-7 animals per group). Time of administration significantly affects this ratio in vehicle treated animals ( $t(11)=4.74$ ,  $p=0.0006$ , t-test) and to a lesser extent in TQD treated animals ( $W=41$ ,  $p=0.002$ ). Mean±SEM in all graphs. N.s.: not significant; \* $p<0.05$ ; \*\* $p<0.01$ ; \*\*\* $p<0.001$ .
